# Supplementary material
Source: PubMed Central journal article supplement (PMC3190197)
Supplement: NIHMS322743-supplement-01.pdf [file NIHMS322743-supplement-01.pdf]

Electronic Supplementary Material S1: Similarity of *Sox2* gene between *O. niloticus* and several vertebrates based on Blast analysis at NCBI.

| Accession number | Nucleotide sequence information                                                                                          | Match score |
|------------------|--------------------------------------------------------------------------------------------------------------------------|-------------|
| EF431921.1       | <i>Oreochromis aureus Sox2 (Sox2) gene, partial cds</i>                                                                  | 100%        |
| FJ432695.1       | <i>Epinephelus coioides</i> cell-line GBC4 <i>Sox2</i> mRNA, partial cds                                                 | 94%         |
| GU001787.1       | <i>Trachinotus blochii Sox2</i> mRNA, partial cds                                                                        | 94%         |
| FJ895588.1       | <i>Oryzias latipes</i> SRY-box containing gene 2 ( <i>Sox2</i> ) mRNA, partial cds                                       | 93%         |
| AY277952.1       | <i>Takifugu rubripes</i> transcription factor <i>Sox2 (Sox2) gene, complete cds</i>                                      | 93%         |
| EF431922.1       | <i>Oreochromis karongae Sox2 (Sox2) gene, partial cds</i>                                                                | 99%         |
| EF431923.1       | <i>Oreochromis mossambicus Sox2 (Sox2) gene, partial cds</i>                                                             | 99%         |
| DQ900581.1       | <i>Gadus morhua Sox2</i> mRNA, partial cds                                                                               | 89%         |
| AB242329.1       | <i>Danio rerio Sox2</i> mRNA for transcription factor <i>SoxSox2</i> , complete cds                                      | 82%         |
| NM_001173447.1   | <i>Felis catus</i> sex determining region Y-box 2 ( <i>SoxSox2</i> ) mRNA, complete cds                                  | 83%         |
| XM_545216.2      | PREDICTED: <i>Canis familiaris</i> similar to Transcription factor <i>SoxSox-2 (LOC488092)</i> , mRNA                    | 82%         |
| XM_002807565.1   | PREDICTED: <i>Callithrix jacchus</i> transcription factor <i>SoxSox-2-like (LOC100407856)</i> , mRNA                     | 82%         |
| XM_002716451.1   | PREDICTED: <i>Oryctolagus cuniculus</i> SRY (sex determining region Y)-box                                               | 82%         |
| EU503117.1       | <i>Sus scrofa</i> sex determining region Y-box 2 ( <i>Sox2</i> ) mRNA, complete cds                                      | 82%         |
| NG_009080.1      | <i>Homo sapiens</i> SRY (sex determining region Y)-box 2 ( <i>SoxSox2</i> ), RefSeqGene on chromosome 3                  | 81%         |
| XM_002814321.1   | PREDICTED: <i>Pongo abelii</i> transcription factor <i>SoxSox-2-like (LOC100460719)</i> , mRNA                           | 82%         |
| NM_001105463.1   | <i>Bos taurus</i> SRY (sex determining region Y)-box 2 ( <i>SoxSox2</i> ), mRNA                                          | 81%         |
| XM_001506934.1   | PREDICTED: <i>Ornithorhynchus anatinus</i> similar to <i>Sox2</i> transcription factor ( <i>LOC100075503</i> ), mRNA     | 81%         |
| NM_001109181.1   | <i>Rattus norvegicus</i> SRY (sex determining region Y)-box 2 ( <i>Sox2</i> ), mRNA                                      | 81%         |
| NM_001142940.1   | <i>Macaca mulatta</i> SRY (sex determining region Y)-box 2 ( <i>SoxSox2</i> ), mRNA                                      | 81%         |
| XM_516895.2      | PREDICTED: <i>Pan troglodytes</i> similar to <i>Sox-2 (LOC460869)</i> , mRNA                                             | 83%         |
| NM_011443.3      | <i>Mus musculus</i> SRY-box containing gene 2 ( <i>Sox2</i> ), mRNA                                                      | 81%         |
| NM_001143799.1   | <i>Equus caballus</i> SRY (sex determining region Y)-box 2 ( <i>SoxSox2</i> ), mRNA                                      | 80%         |
| D50603.1         | <i>Gallus gallus</i> mRNA for <i>SoxSox-2</i> , complete cds                                                             | 79%         |
| XM_001368783.1   | PREDICTED: <i>Monodelphis domestica</i> similar to <i>Sox2</i> transcription factor ( <i>LOC100014523</i> ), mRNA        | 85%         |
| BC159121.1       | <i>Xenopus tropicalis</i> SRY (sex determining region Y)-box 1, mRNA (cDNA clone MGC:172383 IMAGE:7663004), complete cds | 86%         |

Electronic Supplementary Material S2: Similarity of *Sox14* gene between *O. niloticus* and several vertebrates based on Blast analysis at NCBI.

| Accession number | Nucleotide sequence information                                                                                             | Match score |
|------------------|-----------------------------------------------------------------------------------------------------------------------------|-------------|
| EF431925.1       | <i>Oreochromis aureus Sox14 (Sox14) gene, complete cds</i>                                                                  | 99%         |
| EF431927.1       | <i>Oreochromis mossambicus Sox14 (Sox14) gene, partial CDs</i>                                                              | 99%         |
| EF431926.1       | <i>Oreochromis karongae Sox14 (Sox14) gene, partial cds</i>                                                                 | 99%         |
| AY277955.1       | <i>Takifugu rubripes</i> transcription factor <i>Sox14a (Sox14a) gene, complete cds</i>                                     | 90%         |
| NM_001164872.1   | <i>Oryzias latipes</i> SRY-box containing gene 14 ( <i>Sox14</i> )                                                          | 91%         |
| NM_001194657.1   | <i>Macaca mulatta</i> SRY (sex determining region Y)-box 14 ( <i>SoxSox14</i> ), mRNA                                       | 80%         |
| AB063098.1       | <i>Macaca fascicularis</i> brain cDNA clone:QtrA-14282, similar to human SRY-box 14 ( <i>SoxSox14</i> ), mRNA               | 80%         |
| XM_526317.2      | PREDICTED: Pan troglodytes SRY-box 14 ( <i>SoxSox14</i> ), mRNA                                                             | 79%         |
| NM_004189.2      | <i>Homo sapiens</i> SRY (sex determining region Y)-box 14 ( <i>SoxSox14</i> )                                               | 79%         |
| NM_011440.1      | <i>Mus musculus</i> SRY-box containing gene 14 ( <i>Sox14</i> ), mRNA                                                       | 78%         |
| NM_001163781.1   | <i>Bos taurus</i> SRY (sex determining region Y)-box 14 ( <i>SoxSox14</i> ), mRNA                                           | 78%         |
| XM_002742479.1   | PREDICTED: <i>Callithrix jacchus</i> transcription factor <i>SoxSox-21</i> -like, transcript variant 1 (LOC100391037), mRNA | 83%         |
| XM_002814084.1   | PREDICTED: <i>Pongo abelii</i> transcription factor <i>SoxSox-14</i> -like (LOC100460230), mRNA                             | 79%         |
| XM_001916428.1   | PREDICTED: <i>Equus caballus</i> similar to rCG37201 (LOC100147540), mRNA                                                   | 80%         |
| AY612092.1       | <i>Tetraodon nigroviridis</i> transcription factor <i>Sox 8 (SoxSox8) mRNA, complete cds</i>                                | 100%        |

Electronic Supplementary Material S3: Abbreviations and names of genes located in the genomic blocks harbouring *Sox2* and *Sox14* among vertebrates.

ACTL6A - actin-like 6A  
MRPL47 - mitochondrial ribosomal protein L47  
NDUFB5 - NADH dehydrogenase (ubiquinone) 1 beta subcomplex  
USP13 - ubiquitin specific peptidase 13 (isopeptidase T-3)  
PEX5L - peroxisomal biogenesis factor 5-like  
TTC14 - tetratricopeptide repeat domain 14  
CCDC39 - coiled-coil domain containing 39  
FXR1 - fragile X mental retardation, autosomal homolog 1  
DNAJC19 - DnaJ (Hsp40) homolog, subfamily C, member 19  
ATP11B - ATPase, class VI, type 11B  
DCUN1 - DCN1, defective in cullin neddylation 1, domain containing 1  
MCCC1 - methylcrotonoyl-CoA carboxylase 1 (alpha)  
LAMP3 - lysosomal-associated membrane protein 3  
B3GNT5 - UDP-GlcNAc:betaGal beta-1,3-N acetylglucosaminyltransferase 5  
MCF2L2 - MCF.2 cell line derived transforming sequence-like 2  
KLHL6 - kelch-like 6; KLHL24 - kelch-like 24  
YEATS2 - YEATS domain containing 2  
PPP2R3A - protein phosphatase 2, regulatory subunit B', alpha  
M5L2 - male-specific lethal 2 homolog  
PCCB - propionyl CoA carboxylase, beta polypeptide  
STAG1 - stromal antigen 1  
TMEM22 - transmembrane protein 22  
NCK1 - NCK adaptor protein 1  
IL20RB - interleukin 20 receptor beta  
CLDN18 - claudin 18  
DZIP1L - DAZ interacting protein 1-like  
A4GNT - alpha-1,4-N-acetylglucosaminyltransferase  
DBR1 - debranching enzyme homolog 1  
ARMC8 - armadillo repeat containing 8  
TXNDC6 - thioredoxin domain containing 6  
MRAS - muscle RAS oncogene homolog.

Electronic Supplementary Material S4: Abbreviations and names of genes located in the genomic block harbouring *Sox2* among fish species.

ATP11B - AT11B - Probable phospholipid-transporting ATPase

CLD22 - Claudin-22

TIM14 - Mitochondrial import inner membrane translocase subunit TIM14

FXR1 - Fragile X mental retardation syndrome-related protein 1

TTC14 - Tetratricopeptide repeat domain 14

B3GA1 - Galactosylgalactosylxylosylprotein 3-beta-glucuronosyltransferase 1

HPS3 - Hermansky-Pudlak syndrome 3 protein

BCAR3 - Breast cancer anti-estrogen resistance protein 3

FBP1L - Formin-binding protein 1-like

MCCB - Probable methylcrotonoyl-CoA carboxylase beta chain; mitochondrial

RPE65 - Retinoid isomerohydrolase

PAR1 - Proteinase-activated receptor - Abnormal spindle-like microcephaly-associated protein

FA55C - Protein FAM55C.
